# Supplementary material for: An Effective Strategy to Maintain the CALPHAD Atomic Mobility Database of Multicomponent Systems and Its Application to Hcp Mg–Al–Zn–Sn Alloys
Source: MDPI journal article supplement (doi:10.3390/ma15010283), 2021-12-31
Supplement: s1 [file s1]

# An Effective Strategy to Maintain the CALPHAD Atomic Mobility Database of Multicomponent Systems and Its Application to Hcp Mg–Al–Zn–Sn Alloys

Ting Cheng, Jing Zhong and Lijun Zhang \*

State Key Laboratory of Powder Metallurgy, Central South University, Changsha 410083, China; chengting@csu.edu.cn (T.C.); zhongjingjog@csu.edu.cn (J.Z.)

\* Correspondence: lijun.zhang@csu.edu.cn

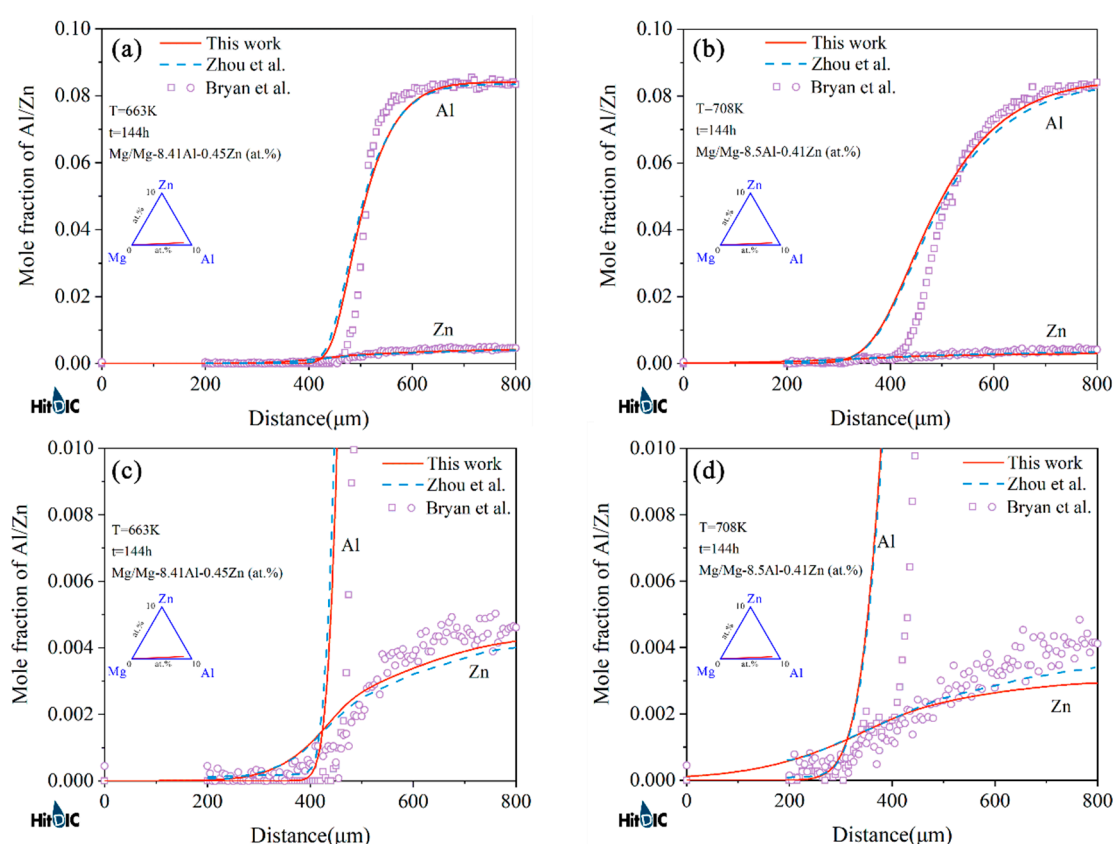

**Figure S1.** Model-predicted composition-distance profiles of different hcp Mg-Al-Zn diffusion couples annealed at (a) 663 K for 144 h, and (b) 708 K for 144 h, as well as enlarged composition-distance curve of Zn annealed at (c) 663 K for 144 h, and (d) 708 K for 144 h, due to the present atomic mobilities (solid lines), compared with those of Zhong et al. [32] (dashed lines) and the experimental data [33] (symbols).
